# Supplementary material
Source: Springer Nature journal article supplement (https://www.springermedizin.de/resource/supplementary/12936_2014_3213_MOESM7_ESM.pdf/9545334)

**Panel A**  
ECs + media

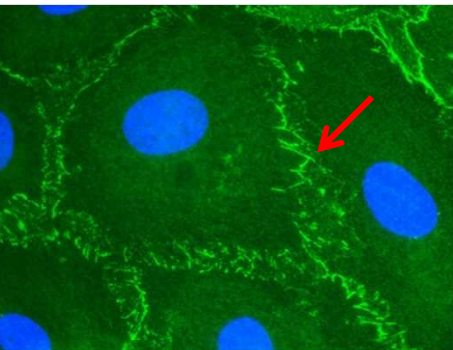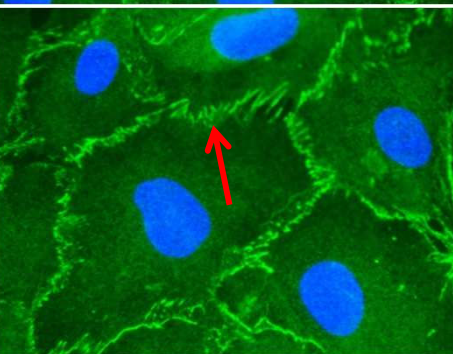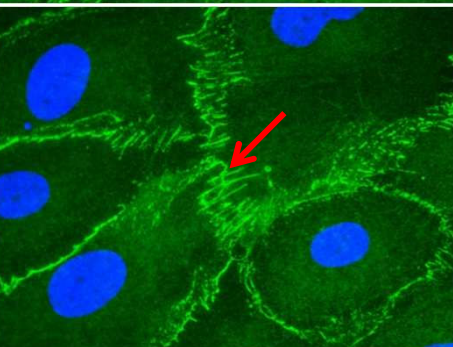

**Panel B**  
ECs + RBCs

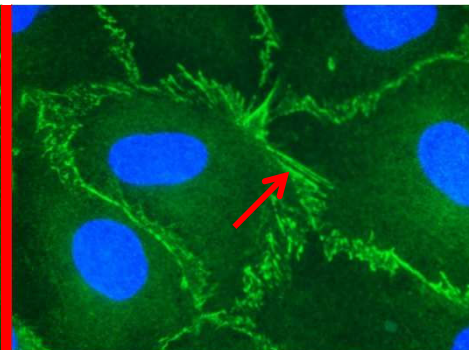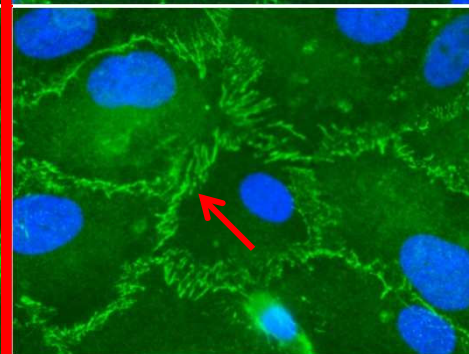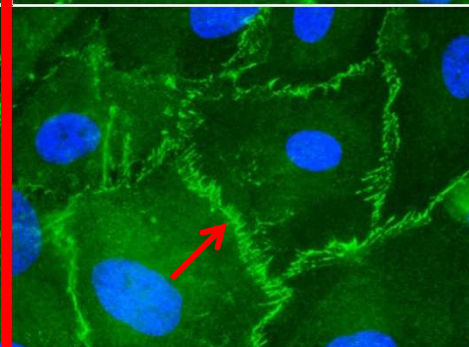

**Panel C**  
ECs + PRBCs

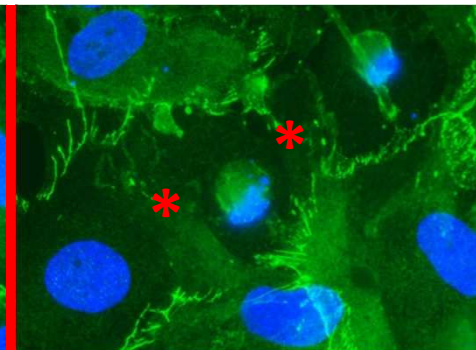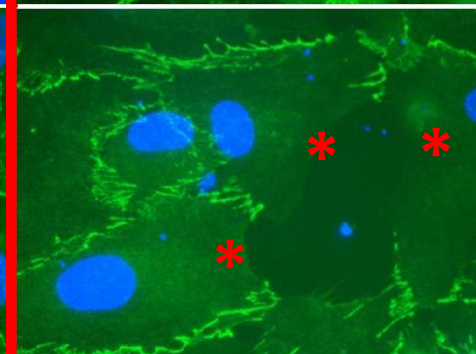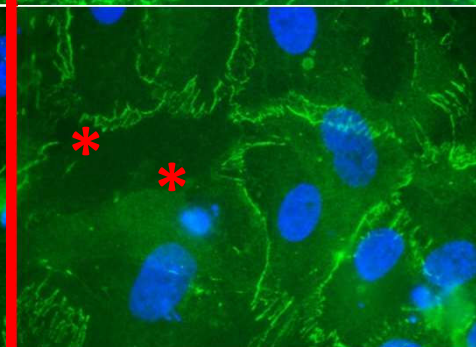

Supplement: MOESM7 [file 9545334]
